# Supplementary material for: Quality of service implications of power control and multiuser detection-based cross-layer design
Source: Springer Nature journal article supplement (doi:10.1186/1687-1499-2011-9), 2011-06-08
Supplement: 13638_2010_8_MOESM7_ESM.pdf [file 13638_2010_8_MOESM7_ESM.pdf]

1<sup>st</sup> minislot4<sup>th</sup> minislot7<sup>th</sup> minislot15<sup>th</sup> minislot

50 m

Fully connected

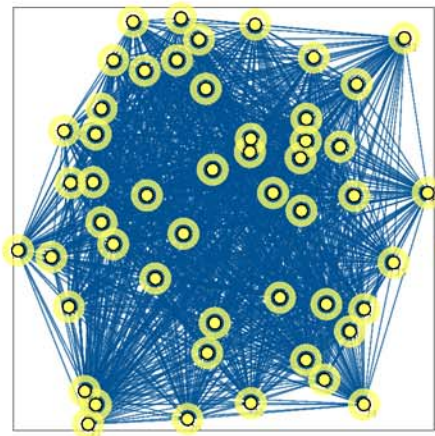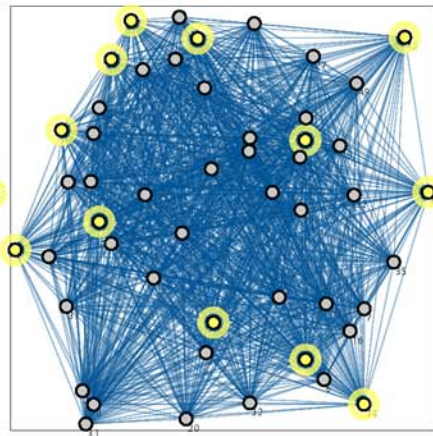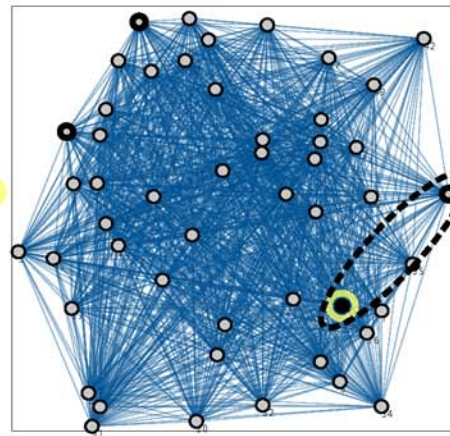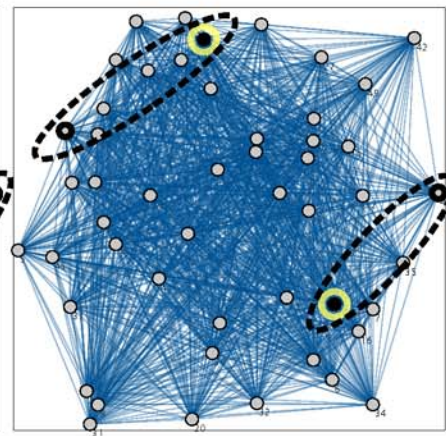

500 m

Partly connected

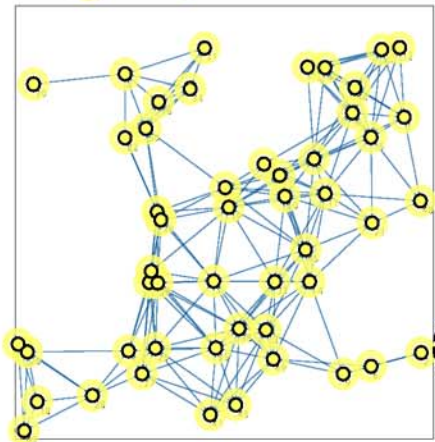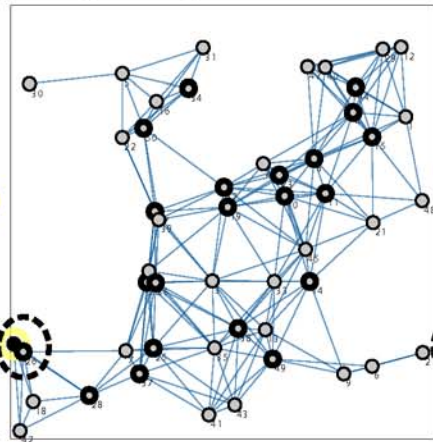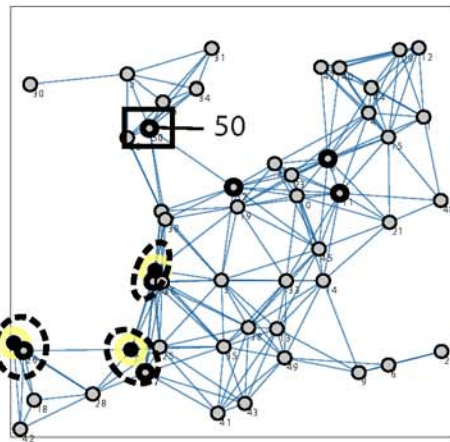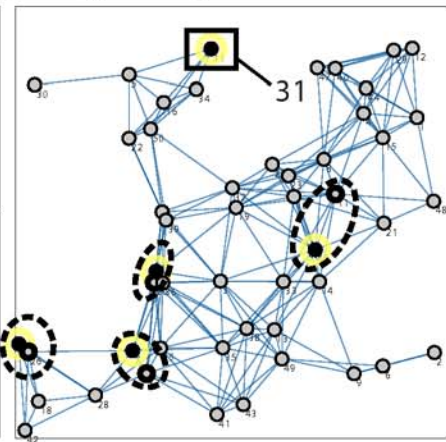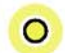

Node transmitting RTS

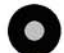

Node awaiting CTS response

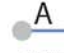

Node awaiting RTS as Receiver

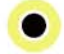

Node transmitting CTS

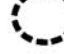

 A — B A and B in communication range  
 communication pair
