# Supplementary material for: Quality of service implications of power control and multiuser detection-based cross-layer design
Source: Springer Nature journal article supplement (doi:10.1186/1687-1499-2011-9), 2011-06-08
Supplement: 13638_2010_8_MOESM8_ESM.pdf [file 13638_2010_8_MOESM8_ESM.pdf]

50 m  
Fully connected

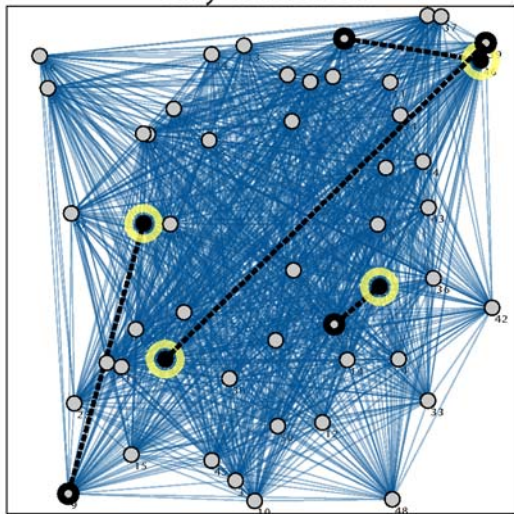

500 m  
Partly connected

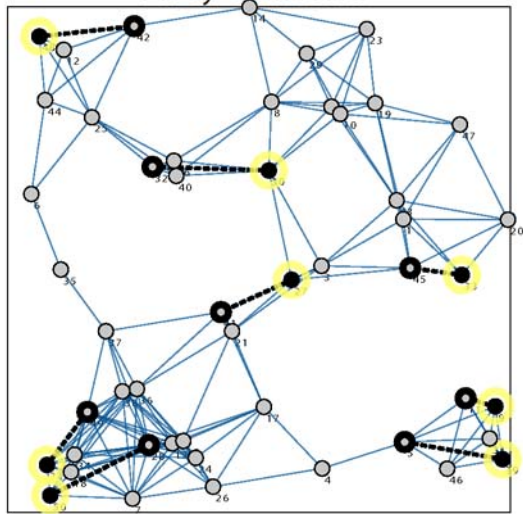

● Data receiver

● Data transmitter

A — B

A - - B

A and B in communication range

A and B data transmission
