# Supplementary material for: Quality of service implications of power control and multiuser detection-based cross-layer design
Source: Springer Nature journal article supplement (doi:10.1186/1687-1499-2011-9), 2011-06-08

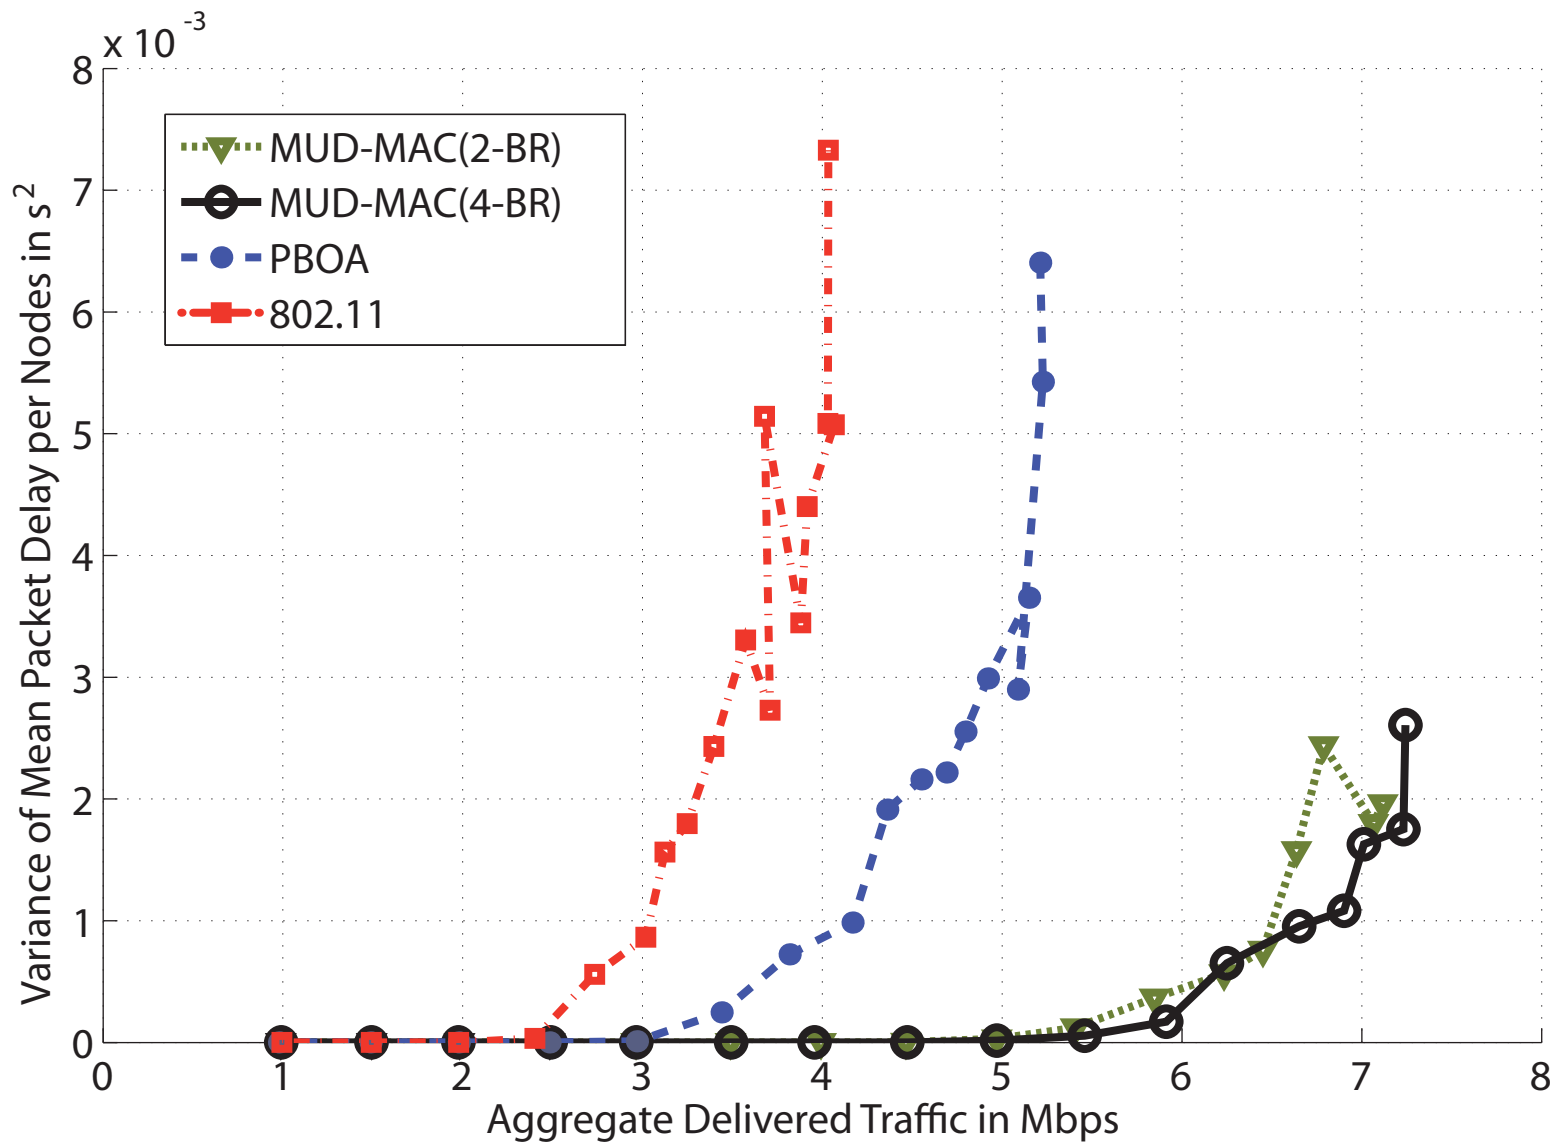

Supplement: 13638_2010_8_MOESM11_ESM.pdf [file 13638_2010_8_MOESM11_ESM.pdf]
